# Supplementary material for: Structural and bonding properties of small TiGen− (n = 2–6) clusters: photoelectron spectroscopy and density functional calculations
Source: Royal Society of Chemistry journal article supplement (doi:10.1039/c4ra02897j), 2014-01-01
Supplement: c4ra02897j1.pdf [file c4ra02897j1.pdf]

## *Supporting Information*

### **Structural and Bonding Properties of Small $\text{TiGe}_n^-$ ( $n = 2-6$ ) Clusters: Photoelectron Spectroscopy and Density Functional Calculations**

Xiao-Jiao Deng, Xiang-Yu Kong, Xi-Ling Xu, Hong-Guang Xu,\* Wei-Jun Zheng\*

*Beijing National Laboratory for Molecular Sciences, State Key Laboratory of Molecular Reaction  
Dynamics, Institute of Chemistry, Chinese Academy of Sciences, Beijing 100190, China*

\* Corresponding authors. E-mail: xuhong@iccas.ac.cn, zhengwj@iccas.ac.cn

Tel: +86 10 62635054, Fax: +86 10 62563167

**Table S1.** Cartesian coordinates for stable isomers of  $\text{TiGe}_n^-$  ( $n = 2-6$ ) clusters.

| <b>TiGe<sub>2</sub><sup>-</sup></b> |            |             |             |           |            |             |
|-------------------------------------|------------|-------------|-------------|-----------|------------|-------------|
| <b>2A</b>                           |            |             |             | <b>2B</b> |            |             |
|                                     | X          | Y           | Z           | X         | Y          | Z           |
| Ge                                  | 0.00000000 | 1.26444200  | -0.53794500 | Ge        | 0.00000000 | 2.04992200  |
| Ge                                  | 0.00000000 | -1.26444200 | -0.53794500 | Ge        | 0.00000000 | -0.20114900 |
| Ti                                  | 0.00000000 | 0.00000000  | 1.56493100  | Ti        | 0.00000000 | -2.68912500 |

  

| <b>TiGe<sub>3</sub><sup>-</sup></b> |             |             |             |    |            |             |
|-------------------------------------|-------------|-------------|-------------|----|------------|-------------|
|                                     | <b>3A</b>   |             |             |    | <b>3B</b>  |             |
|                                     | X           | Y           | Z           | X  | Y          | Z           |
| Ge                                  | 0.89107200  | -1.26215200 | -0.27798300 | Ge | 0.00000000 | 1.35608700  |
| Ge                                  | -1.58548400 | -0.00099000 | -0.49836000 | Ge | 0.00000000 | -0.11145500 |
| Ge                                  | 0.88815200  | 1.26419800  | -0.27664500 | Ge | 0.00000000 | -0.11145500 |
| Ti                                  | -0.28180400 | -0.00153500 | 1.53162000  | Ti | 0.00000000 | -1.64825600 |

  

| <b>TiGe<sub>4</sub><sup>-</sup></b> |             |             |             |    |             |             |
|-------------------------------------|-------------|-------------|-------------|----|-------------|-------------|
|                                     | <b>4A</b>   |             |             |    | <b>4B</b>   |             |
|                                     | X           | Y           | Z           | X  | Y           | Z           |
| Ge                                  | 0.00040000  | -1.46065000 | -0.61453400 | Ge | -1.78476600 | -0.24238100 |
| Ge                                  | 0.00055700  | 1.46113600  | -0.61398400 | Ge | 0.13110300  | 1.57018200  |
| Ge                                  | -1.99947800 | -0.00003400 | 0.05464700  | Ge | 0.13110300  | -1.57018200 |
| Ge                                  | 1.99907700  | -0.00014800 | 0.05540400  | Ge | 0.13110300  | 0.00000000  |
| Ti                                  | -0.00080900 | -0.00044200 | 1.62686100  | Ti | 2.02393900  | -0.02384100 |

  

| <b>4C</b> |             |             |
|-----------|-------------|-------------|
| Ge        | -1.30496200 | 1.22000000  |
| Ge        | 1.30501800  | 1.22000600  |
| Ge        | -2.52373700 | -0.83231900 |
| Ge        | 2.52368700  | -0.83236800 |
| Ti        | -0.00000700 | -1.12773500 |

  

| <b>TiGe<sub>5</sub><sup>-</sup></b> |             |             |             |    |             |             |
|-------------------------------------|-------------|-------------|-------------|----|-------------|-------------|
|                                     | <b>5A</b>   |             |             |    | <b>5B</b>   |             |
|                                     | X           | Y           | Z           | X  | Y           | Z           |
| Ge                                  | 0.00000000  | 0.00000000  | 1.68703300  | Ge | -0.01269500 | -1.37160300 |
| Ge                                  | 0.00000000  | 1.93005400  | -0.11202800 | Ge | 2.02060800  | -0.00000300 |
| Ge                                  | 0.00000000  | -1.93005400 | -0.11202800 | Ge | -0.01269500 | 1.37161900  |
| Ge                                  | -1.93005400 | 0.00000000  | -0.11202800 | Ge | -2.17005900 | -0.00000200 |
| Ge                                  | 1.93005400  | 0.00000000  | -0.11202800 | Ge | 1.11709600  | -0.00000600 |
| Ti                                  | 0.00000000  | 0.00000000  | -1.80206900 | Ti | -1.37055200 | -0.00000800 |

  

| <b>5C</b> |             |             |
|-----------|-------------|-------------|
| Ge        | 1.06587000  | -1.76458500 |
| Ge        | -0.27139000 | -0.14153600 |

|    |             |             |             |
|----|-------------|-------------|-------------|
| Ge | 1.74218400  | 0.80002400  | -0.00013000 |
| Ge | -0.27147600 | -0.14160700 | -1.44828200 |
| Ge | -0.63491800 | 1.94015400  | -0.00002100 |
| Ti | -2.37130200 | -1.00720200 | -0.00009300 |

**TiGe<sub>6</sub>**

| 6A |             |             | 6B          |    |             |             |             |
|----|-------------|-------------|-------------|----|-------------|-------------|-------------|
| X  | Y           | Z           | X           | Y  | Z           |             |             |
| Ge | 1.55728300  | 1.53350700  | -0.13366300 | Ge | -0.29888083 | -1.18415764 | 2.15980078  |
| Ge | -0.97831000 | 1.97380400  | -0.06529200 | Ge | -0.29888083 | -1.18415764 | -2.15980078 |
| Ge | 1.97281400  | -0.94962900 | -0.11911300 | Ge | 0.52575511  | -2.21406793 | 0.00000000  |
| Ge | -0.24402300 | -2.17425000 | -0.12352100 | Ge | 0.60700105  | 1.09004079  | 1.85074254  |
| Ge | -2.17415400 | -0.41077500 | -0.02679400 | Ge | 0.60700105  | 1.09004079  | -1.85074254 |
| Ge | 0.02270000  | -0.00443200 | 1.58904700  | Ge | -0.36945510 | 2.42559103  | 0.00000000  |
| Ti | -0.22736000 | 0.04621900  | -1.63005700 | Ti | -1.12369899 | -0.03718300 | 0.00000000  |

**6C**

|    |             |             |             |
|----|-------------|-------------|-------------|
| Ge | 2.61170500  | -0.00042500 | -0.47328700 |
| Ge | -0.80521000 | 1.46218500  | 0.74986300  |
| Ge | -0.80379500 | -1.46357300 | 0.74856300  |
| Ge | 1.58036900  | 1.41537100  | -0.72135000 |
| Ge | 1.28998100  | 0.00039200  | 1.46873800  |
| Ge | 1.58278400  | -1.41368600 | -0.72076500 |
| Ti | -0.33807300 | -0.00038300 | -1.52983500 |
